# Supplementary material
Source: HighWire-hosted journal article supplement (http://dmd.aspetjournals.org/highwire/filestream/79758/field_highwire_adjunct_files/1/1087_supp_fig2.pdf)
Supplement: 1087_supp_fig2.pdf [file 1087_supp_fig2.pdf]

**Metabolic disposition of triazolam and clobazam in humanized CYP3A mice with a double knockout background of mouse *Cyp2c* and *Cyp3a* genes**

Kaoru Kobayashi, Genki Minegishi, Nina Kuriyama, Atsushi Miyajima, Satoshi Abe, Kanako Kazuki, Yasuhiro Kazuki

Drug Metabolism and Disposition

Manuscript Number: DMD-AR-2022-001087

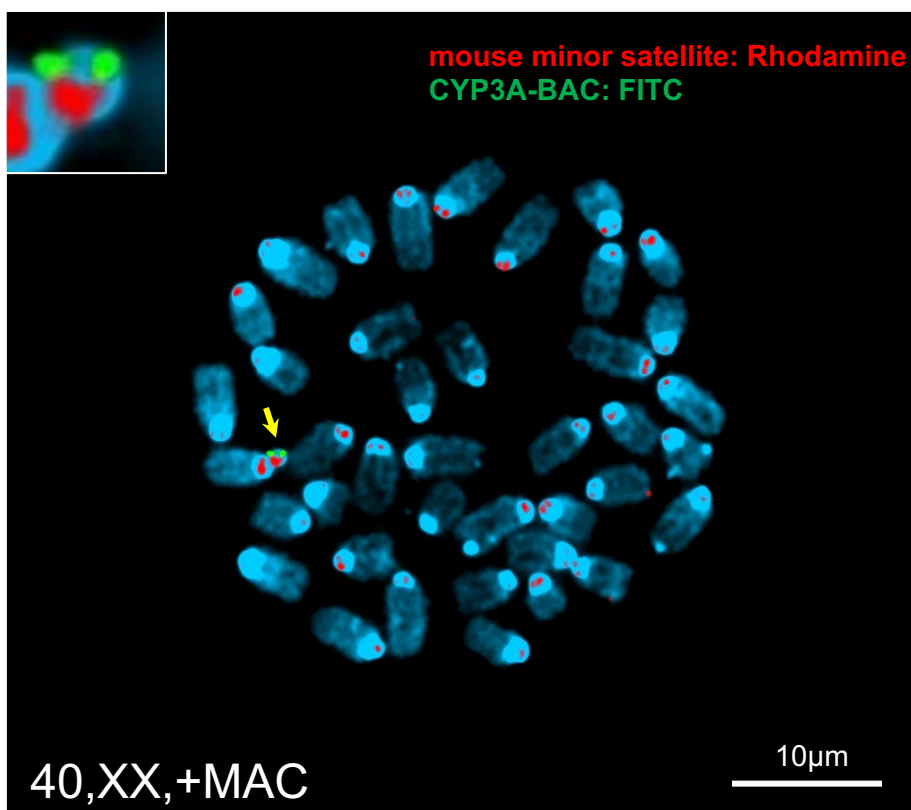

**Supplemental Fig. 2 Retention of CYP3A-MAC in hCYP3A/2c3aKO mice.**

Representative FISH image of metaphase spreads from lymphocytes in hCYP3A/2c3aKO mice. Yellow arrow indicates CYP3A-MAC which is enlarged as inset.
